# Supplementary material for: Efficacy and Safety Outcomes of Extended Criteria Donor Kidneys by Subtype: Subgroup Analysis of BENEFIT‐EXT at 7 Years After Transplant
Source: PubMed Central journal article supplement — Am J Transplant. 2016 Jul 12;17(1):180–90. doi: 10.1111/ajt.13886 (PMC5215636; doi:10.1111/ajt.13886), 2016-07-12
Supplement: AJT-17-180-s005.pdf [file AJT-17-180-s005.pdf]

|                                                          |               |               |      |
|----------------------------------------------------------|---------------|---------------|------|
|                                                          | Belatacept MI | Belatacept LI | CsA  |
| Kaplan–Meier estimated rate of graft loss at Month 84, % | 16.7          | 0             | 48.7 |

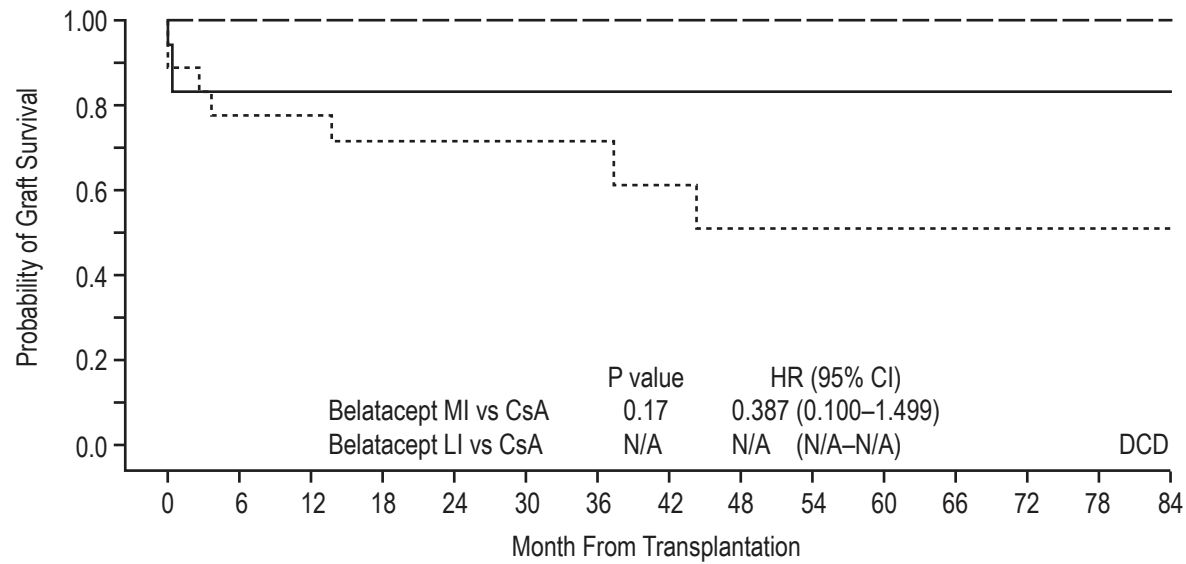

| N at risk         | 0  | 6  | 12 | 18 | 24 | 30 | 36 | 42 | 48 | 54 | 60 | 66 | 72 | 78 | 84 |
|-------------------|----|----|----|----|----|----|----|----|----|----|----|----|----|----|----|
| — Belatacept MI   | 18 | 16 | 15 | 15 | 15 | 14 | 14 | 9  | 9  | 9  | 8  | 8  | 7  | 6  | 2  |
| - - Belatacept LI | 19 | 19 | 19 | 19 | 19 | 19 | 15 | 13 | 12 | 12 | 12 | 12 | 11 | 11 | 9  |
| ..... CsA         | 18 | 14 | 14 | 12 | 12 | 12 | 10 | 7  | 6  | 5  | 5  | 5  | 5  | 5  | 3  |
