# Supplementary figures and images for: Efficacy and Safety Outcomes of Extended Criteria Donor Kidneys by Subtype: Subgroup Analysis of BENEFIT‐EXT at 7 Years After Transplant
Source: PubMed Central journal article supplement — Am J Transplant. 2016 Jul 12;17(1):180–90. doi: 10.1111/ajt.13886 (PMC5215636; doi:10.1111/ajt.13886), 2016-07-12

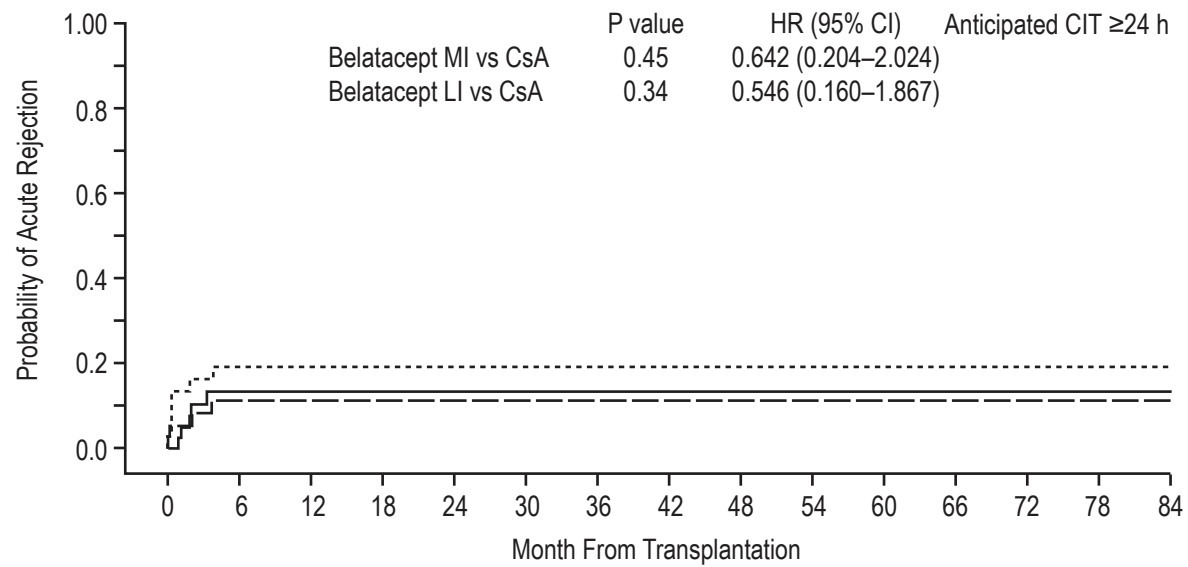

| N at risk |               | 0  | 6  | 12 | 18 | 24 | 30 | 36 | 42 | 48 | 54 | 60 | 66 | 72 | 78 | 84 |
|-----------|---------------|----|----|----|----|----|----|----|----|----|----|----|----|----|----|----|
| —         | Belatacept MI | 40 | 30 | 28 | 28 | 28 | 27 | 26 | 24 | 23 | 22 | 22 | 22 | 21 | 20 | 15 |
| - -       | Belatacept LI | 37 | 30 | 27 | 27 | 25 | 25 | 23 | 23 | 22 | 20 | 19 | 18 | 18 | 18 | 16 |
| .....     | CsA           | 37 | 29 | 26 | 25 | 25 | 25 | 21 | 20 | 20 | 20 | 19 | 16 | 16 | 16 | 11 |

Supplement: AJT-17-180-s015.pdf [file AJT-17-180-s015.pdf]
